# Supplementary material for: In Situ-Generated, Dispersed Cu Catalysts for the Catalytic Hydrogenolysis of Glycerol
Source: MDPI journal article supplement (doi:10.3390/molecules27248778), 2022-12-11
Supplement: s1 [file s1]

## Supplementary Materials to the article

# In Situ-Generated, Dispersed Cu Catalysts for the Catalytic Hydrogenolysis of Glycerol

By Iuliana Porukova, Vadim Samoilov, Dzhamulutdin Ramazanov, Mariia Kniazeva, Anton Maximov

**Table S1.** The average values of conversion of glycerol ( $X_{\text{Gly}}$ ), yields of products ( $Y$ ) under different reaction conditions during glycerol hydrogenolysis ( $S$  – standard derivation of the value on the left,  $N$  – the number of experiments). Conditions:  $T = 200^{\circ}\text{C}$ ,  $\text{Gly}/\text{H}_2\text{O} = 4.1$  vol, precursor salt =  $\text{Cu}(\text{OAc})_2 \cdot \text{H}_2\text{O}$

| Entry | Gly/Cu, mol | KOH/Cu, mol | $\tau$ , h | p(H <sub>2</sub> ), MPa | X <sub>Gly</sub> , % | S <sub>x</sub> , % | Y <sub>EG</sub> , % | S <sub>y</sub> , % | Y <sub>PG</sub> , % | S <sub>y</sub> , % | Y <sub>LA</sub> , % | S <sub>y</sub> , % | Y <sub>GA</sub> , % | S <sub>y</sub> , % | N   |
|-------|-------------|-------------|------------|-------------------------|----------------------|--------------------|---------------------|--------------------|---------------------|--------------------|---------------------|--------------------|---------------------|--------------------|-----|
| 1     | 50          | 0           | 5          | 3                       | 3.1                  | 0.4                | -                   | -                  | 0.1                 | 0.1                | 1.4                 | 0.4                | 1.6                 | 0.1                | 2   |
| 2     |             | 5.8         | 2.5        | 1                       | 9.9                  | 0.5                | 0.2                 | 0.1                | 3.7                 | 0.3                | 4.5                 | 0.4                | 1.5                 | 0.1                | 2   |
| 3     |             |             |            | 2                       | 11.5                 | 0.6                | 0.3                 | 0.1                | 5.4                 | 0.6                | 4.2                 | 0.1                | 1.6                 | 0.1                | 2   |
| 4     |             |             |            | 3                       | 13.0                 | 2.3                | 0.2                 | 0.1                | 7.7                 | 1.5                | 3.2                 | 0.3                | 1.9                 | 0.4                | 2   |
| 5     |             |             |            | 4                       | 13.0                 | 1.2                | 0.4                 | 0.2                | 7.2                 | 0.9                | 3.7                 | 0.5                | 1.7                 | 0.1                | 2   |
| 6     |             |             |            | 5                       | 3                    | 14.8               | 0.2                 | 0.3                | 0.1                 | 8.9                | 0.4                 | 3.7                | 0.2                 | 1.9                | 0.1 |
| 7     |             |             | 10         | 15.5                    |                      | 0.6                | 0.6                 | 0.1                | 8.0                 | 0.2                | 5.7                 | 0.3                | 1.2                 | 0.1                | 2   |
| 8     |             |             | 100        | 5                       |                      | 7.0                | 0.5                 | 0.1                | 0.1                 | 3.6                | 0.5                 | 2.6                | 1.3                 | 0.7                | 0.4 |
| 9     | 10          |             |            | 7.1                     | 0.6                  | 0.2                | 0.1                 | 3.7                | 0.3                 | 2.5                | 0.3                 | 0.7                | 0.1                 | 2                  |     |

**Table S2.** The average values of conversion of glycerol ( $X_{\text{Gly}}$ ), yields of products ( $Y$ ) under different reaction conditions during glycerol hydrogenolysis ( $S$  – standard derivation of the value on the left,  $N$  – the number of experiments). Conditions:  $T = 220^{\circ}\text{C}$ ,  $p(\text{H}_2) = 3 \text{ MPa}$ , precursor salt =  $\text{Cu}(\text{OAc})_2 \cdot \text{H}_2\text{O}$

| Entry | Gly/Cu, mol | KOH/Cu, mol | Gly/H <sub>2</sub> O, vol | τ, h | X <sub>Gly</sub> , % | S <sub>x</sub> , % | Y <sub>EG</sub> , % | S <sub>y</sub> , % | Y <sub>PG</sub> , % | S <sub>y</sub> , % | Y <sub>LA</sub> , % | S <sub>y</sub> , % | Y <sub>GA</sub> , % | S <sub>y</sub> , % | N   |     |
|-------|-------------|-------------|---------------------------|------|----------------------|--------------------|---------------------|--------------------|---------------------|--------------------|---------------------|--------------------|---------------------|--------------------|-----|-----|
| 1     | 50          | 0           | 4.1                       | 5    | 3.4                  | 1.1                | 0.2                 | 0.1                | 0.8                 | 0.6                | 0.9                 | 0.5                | 1.5                 | 0.1                | 16  |     |
| 2     |             | 0.3         |                           |      | 2.8                  | 0.2                | -                   | -                  | 0.8                 | 0.2                | 0.6                 | 0.1                | 1.4                 | 0.1                | 2   |     |
| 3     |             | 0.8         |                           |      | 3.5                  | -                  | -                   | -                  | 1.1                 | -                  | 1.1                 | -                  | 1.3                 | -                  | 1   |     |
| 4     |             | 2.3         |                           | 4.1  | 1                    | 2.9                | 0.6                 | 0.1                | 0.1                 | 1.9                | 0.5                 | 0.7                | 0.1                 | 0.2                | 0.1 | 2   |
| 5     |             |             |                           |      | 2.5                  | 8.0                | 1.4                 | 0.3                | 0.1                 | 6.1                | 1.2                 | 1.0                | 0.1                 | 0.6                | 0.1 | 2   |
| 6     |             |             |                           |      | 5                    | 13.4               | 1.5                 | 0.7                | 0.1                 | 10.0               | 1.1                 | 1.7                | 0.5                 | 1.0                | 0.2 | 2   |
| 7     |             |             |                           |      | 10                   | 15.3               | 2.4                 | 0.8                | 0.3                 | 11.2               | 2.0                 | 2.5                | 0.1                 | 0.8                | 0.1 | 2   |
| 8     |             |             |                           |      | 15                   | 23.8               | 2.1                 | 1.1                | 0.4                 | 17.9               | 2.6                 | 3.9                | 0.9                 | 0.9                | 0.2 | 3   |
| 9     |             |             |                           |      | 30                   | 30.6               | 1.1                 | 1.1                | 0.2                 | 22.9               | 1.2                 | 5.7                | 1.4                 | 0.9                | 0.1 | 3   |
| 10    |             |             |                           |      | 60                   | 32.7               | 0.9                 | 1.5                | 0.1                 | 26.0               | 0.1                 | 4.0                | 0.7                 | 1.2                | 0.4 | 2   |
| 11    |             |             |                           |      | 3.6                  | 5                  | 12.6                | -                  | 0.4                 | -                  | 6.3                 | -                  | 4.7                 | -                  | 1.2 | 0.1 |
| 12    |             | 4.6         |                           | 12.8 | -                    |                    | 0.4                 | -                  | 6.4                 | -                  | 4.4                 | -                  | 1.6                 | 0.1                | 1   |     |
| 13    |             | 5.8         | 0.4                       | 5    | 13.3                 | 1.4                | 0.4                 | 0.1                | 4.0                 | 0.4                | 7.3                 | 1.2                | 1.6                 | 0.6                | 2   |     |
| 14    |             |             | 0.8                       |      | 14.5                 | 1.8                | 0.6                 | 0.1                | 6.8                 | 1.8                | 5.9                 | 0.3                | 1.2                 | 0.1                | 3   |     |
| 15    |             |             | 1.4                       |      | 13.7                 | 0.1                | 0.3                 | 0.1                | 6.5                 | 1.4                | 5.3                 | 2.0                | 1.6                 | 0.5                | 2   |     |
| 16    |             |             | 2.1                       | 30   | 13.4                 | 0.6                | 0.4                 | 0.1                | 5.9                 | 0.5                | 5.8                 | 0.1                | 1.3                 | 0.1                | 2   |     |
| 17    |             |             | 4.1                       | 1    | 12.6                 | 1.7                | 0.4                 | 0.1                | 6.9                 | 1.0                | 4.0                 | 0.8                | 1.3                 | 0.2                | 13  |     |
| 18    |             |             |                           | 2.5  | 14.4                 | 1.0                | 0.4                 | 0.1                | 7.5                 | 0.8                | 5.1                 | 0.9                | 1.4                 | 0.3                | 3   |     |
| 19    |             |             |                           | 5    | 16.8                 | 2.4                | 0.7                 | 0.2                | 8.5                 | 1.6                | 6.8                 | 1.2                | 0.8                 | 0.4                | 21  |     |
| 20    |             |             |                           | 10   | 18.5                 | 1.3                | 0.8                 | 0.2                | 9.4                 | 0.8                | 7.4                 | 0.6                | 0.9                 | 0.3                | 2   |     |
| 21    |             |             |                           | 15   | 20.3                 | 2.4                | 0.8                 | 0.2                | 10.4                | 1.6                | 8.4                 | 1.1                | 0.7                 | 0.3                | 13  |     |
| 22    |             |             |                           | 30   | 24.4                 | 2.8                | 1.1                 | 0.4                | 13.5                | 2.4                | 9.1                 | 0.1                | 0.7                 | 0.1                | 2   |     |
| 23    |             |             |                           | 60   | 23.2                 | 2.5                | 0.8                 | 0.2                | 12.9                | 2.8                | 8.9                 | 0.3                | 0.6                 | 0.3                | 2   |     |
| 24    | 100         | 0           | 4.1                       | 5    | 2.9                  | 0.3                | 0.1                 | 0.1                | 1.4                 | 0.3                | 0.7                 | 0.1                | 0.7                 | 0.1                | 2   |     |
| 25    |             | 0.3         |                           |      | 2.5                  | 0.2                | 0.1                 | 0.1                | 1.1                 | 0.3                | 0.6                 | 0.1                | 0.7                 | 0.1                | 2   |     |
| 26    |             | 5.8         |                           |      | 7.8                  | 0.6                | 0.2                 | 0.1                | 4.0                 | 0.4                | 3.2                 | 0.1                | 0.4                 | 0.1                | 2   |     |
| 27    |             |             |                           | 10   | 11.5                 | 0.7                | 0.3                 | 0.2                | 5.1                 | 0.1                | 5.6                 | 0.4                | 0.5                 | 0.1                | 2   |     |
| 28    |             |             |                           | 15   | 8.6                  | 0.7                | 0.3                 | 0.1                | 4.4                 | 0.4                | 3.4                 | 0.3                | 0.5                 | 0.1                | 2   |     |
| 29    |             | 10          |                           | 10.6 | -                    | 0.5                | -                   | 5.3                | -                   | 4.2                | -                   | 0.6                | -                   | 1                  |     |     |

|    |     |      |  |  |     |     |     |     |     |     |     |     |     |     |   |
|----|-----|------|--|--|-----|-----|-----|-----|-----|-----|-----|-----|-----|-----|---|
| 30 | 200 | 5.0  |  |  | 3.9 | 0.4 | 0.1 | 0.1 | 2.0 | 0.1 | 1.5 | 0.3 | 0.3 | 0.1 | 2 |
| 31 | 219 | 11.0 |  |  | 5.9 | 2.1 | 0.2 | 0.1 | 2.6 | 1.2 | 2.9 | 0.6 | 0.2 | 0.2 | 2 |

**Table S3.** The average values of conversion of glycerol ( $X_{\text{Gly}}$ ), yields of products ( $Y$ ) under different reaction conditions during glycerol hydrogenolysis ( $S$  – standard derivation of the value on the left,  $N$  – the number of experiments). Conditions:  $p(\text{H}_2) = 3 \text{ MPa}$ ,  $\text{Gly}/\text{H}_2\text{O} = 4.1 \text{ vol}$

| Entry | Precursor salt or catalyst           | T, °C | Gly/Cu, mol | KOH/Cu, mol | τ, h | X <sub>Gly</sub> , % | S <sub>x</sub> , % | Y <sub>EG</sub> , % | S <sub>y</sub> , % | Y <sub>PG</sub> , % | S <sub>y</sub> , % | Y <sub>LA</sub> , % | S <sub>y</sub> , % | Y <sub>GA</sub> , % | S <sub>y</sub> , % | N |   |   |
|-------|--------------------------------------|-------|-------------|-------------|------|----------------------|--------------------|---------------------|--------------------|---------------------|--------------------|---------------------|--------------------|---------------------|--------------------|---|---|---|
| 1     | CuSO <sub>4</sub> ·5H <sub>2</sub> O | 200   | 50          | 5.8         | 5    | 15.0                 | 0.1                | 0.4                 | 0.1                | 7.0                 | 0.2                | 7.0                 | 0.2                | 0.6                 | 0.1                | 2 |   |   |
| 2     |                                      |       |             |             | 10   | 15.2                 | 1.6                | 0.5                 | 0.1                | 8.9                 | 1.2                | 5.0                 | 0.4                | 0.8                 | 0.1                | 3 |   |   |
| 3     |                                      |       | 100         |             | 5    | 7.0                  | -                  | 0.2                 | -                  | 4.0                 | -                  | 2.5                 | -                  | 0.3                 | -                  | 1 |   |   |
| 4     |                                      |       |             |             | 10   | 8.1                  | -                  | 0.4                 | -                  | 4.7                 | -                  | 2.9                 | -                  | 0.1                 | -                  | 1 |   |   |
| 5     |                                      | 220   | 50          |             | 5    | 16.6                 | 1.2                | 0.8                 | 0.2                | 10.4                | 1.5                | 5.1                 | 1.9                | 0.3                 | 0.2                | 2 |   |   |
| 6     |                                      |       |             |             | 10   | 18.4                 | 1.8                | 0.9                 | 0.2                | 10.7                | 1.2                | 6.8                 | 0.7                | -                   | -                  | 2 |   |   |
| 7     |                                      |       | 100         |             | 5    | 8.5                  | -                  | 0.4                 | -                  | 4.7                 | -                  | 3.3                 | -                  | 0.1                 | -                  | 1 |   |   |
| 8     |                                      |       |             |             | 10   | 8.5                  | -                  | 0.3                 | -                  | 4.8                 | -                  | 3.4                 | -                  | -                   | -                  | 1 |   |   |
| 9     | Cu-Cr <sub>2</sub> O <sub>3</sub>    | 200   | 50          | 0           | 5    | 7.4                  | 1.9                | 0.1                 | 0.1                | 6.0                 | 2.0                | 1.3                 | 0.1                | -                   | -                  | 2 |   |   |
| 10    |                                      |       |             |             | 10   | 10.6                 | 2.7                | 0.1                 | 0.1                | 10.1                | 2.0                | 0.4                 | 0.3                | -                   | -                  | 2 |   |   |
| 11    |                                      |       | 100         |             | 5    | 3.6                  | 0.5                | -                   | -                  | 3.6                 | 0.4                | -                   | -                  | -                   | -                  | 2 |   |   |
| 12    |                                      |       |             |             | 10   | 9.3                  | 1.2                | 0.3                 | 0.2                | 8.3                 | 1.6                | 0.7                 | 0.2                | -                   | -                  | 3 |   |   |
| 13    |                                      | 220   | 50          |             | 5    | 19.0                 | 1.6                | 0.2                 | 0.1                | 17.3                | 1.7                | 1.5                 | 0.1                | -                   | -                  | 2 |   |   |
| 14    |                                      |       |             |             | 10   | 26.1                 | 0.9                | 0.2                 | 0.1                | 25.4                | 1.3                | 0.5                 | 0.4                | -                   | -                  | 2 |   |   |
| 15    |                                      |       | 100         |             | 5.8  | 5                    | 34.5               | -                   | 1.5                | -                   | 23.6               | -                   | 9.4                | -                   | -                  | - | 1 |   |
| 16    |                                      |       |             |             | 0    | 5                    | 11.8               | 0.9                 | 0.1                | 0.1                 | 8.6                | 0.8                 | 3.1                | 0.1                 | -                  | - | 2 |   |
| 17    |                                      |       |             |             |      | 10                   | 19.5               | 3.7                 | 0.1                | 0.1                 | 19.0               | 4.1                 | 0.4                | 0.4                 | -                  | - | 3 |   |
| 18    |                                      |       |             |             |      | 230                  | 50                 | 5                   | 31.8               | -                   | 1.3                | -                   | 20.7               | -                   | 9.8                | - | - | - |
| 19    | CuCl <sub>2</sub> ·2H <sub>2</sub> O | 200   | 50          | 5.8         | 5    | 11.0                 | 3.6                | 0.3                 | 0.1                | 5.8                 | 3.0                | 4.3                 | 0.3                | 0.6                 | 0.3                | 2 |   |   |
| 20    |                                      | 220   |             |             |      | 16.2                 | 1.0                | 0.5                 | 0                  | 6.7                 | 0.1                | 8.3                 | 1.0                | 0.7                 | 0.1                | 2 |   |   |

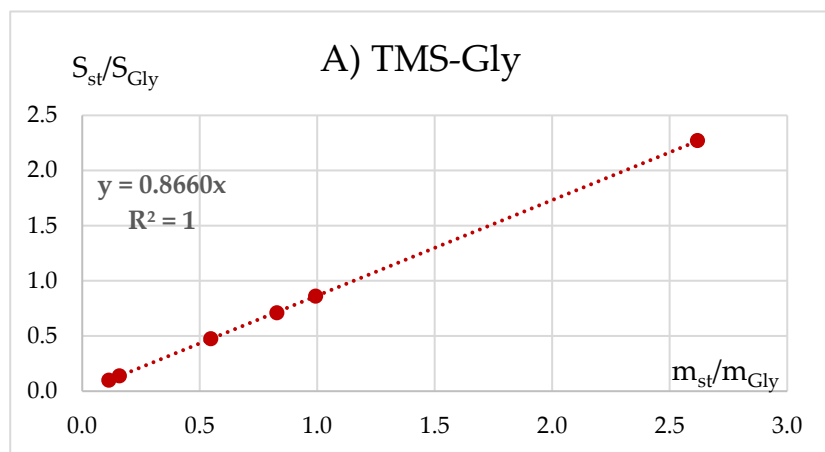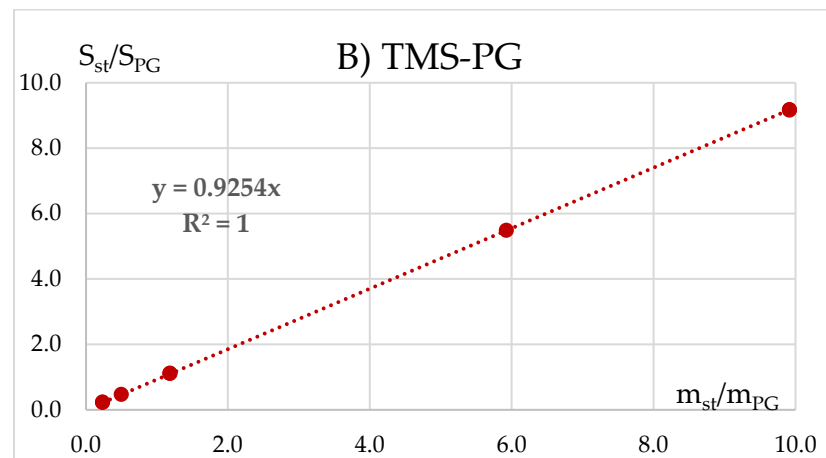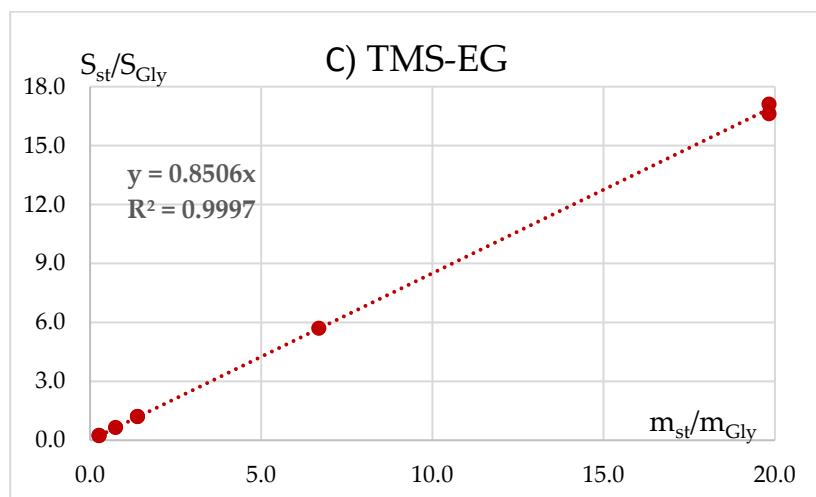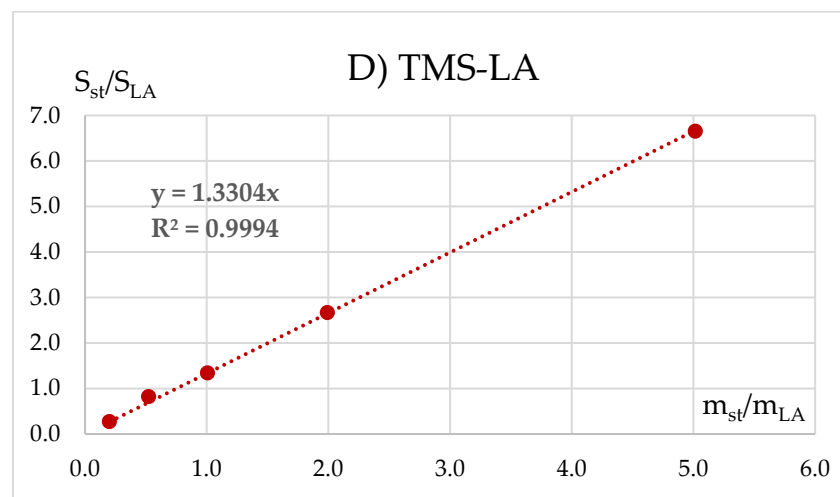

**Figure S1.** Calibration plots of response ratio ( $S_{st}/S$ ) versus mass ratio ( $m_{st}/m$ ) for internal standardization by GC-FID for **A:** TMS-Gly derivative; **B:** TMS-PG derivative; **C:** TMS-EG derivative; **D:** TMS-LA derivative. For GA, the same coefficient was used as for Gly.

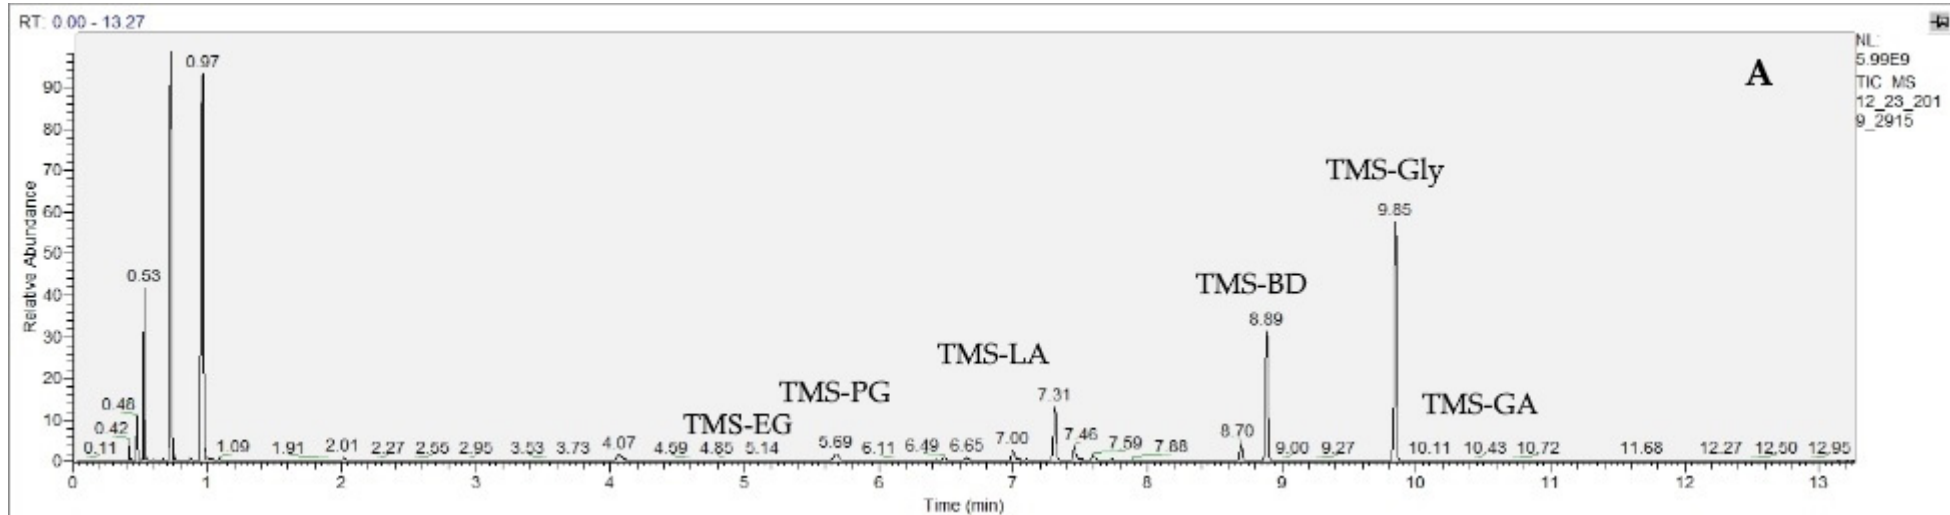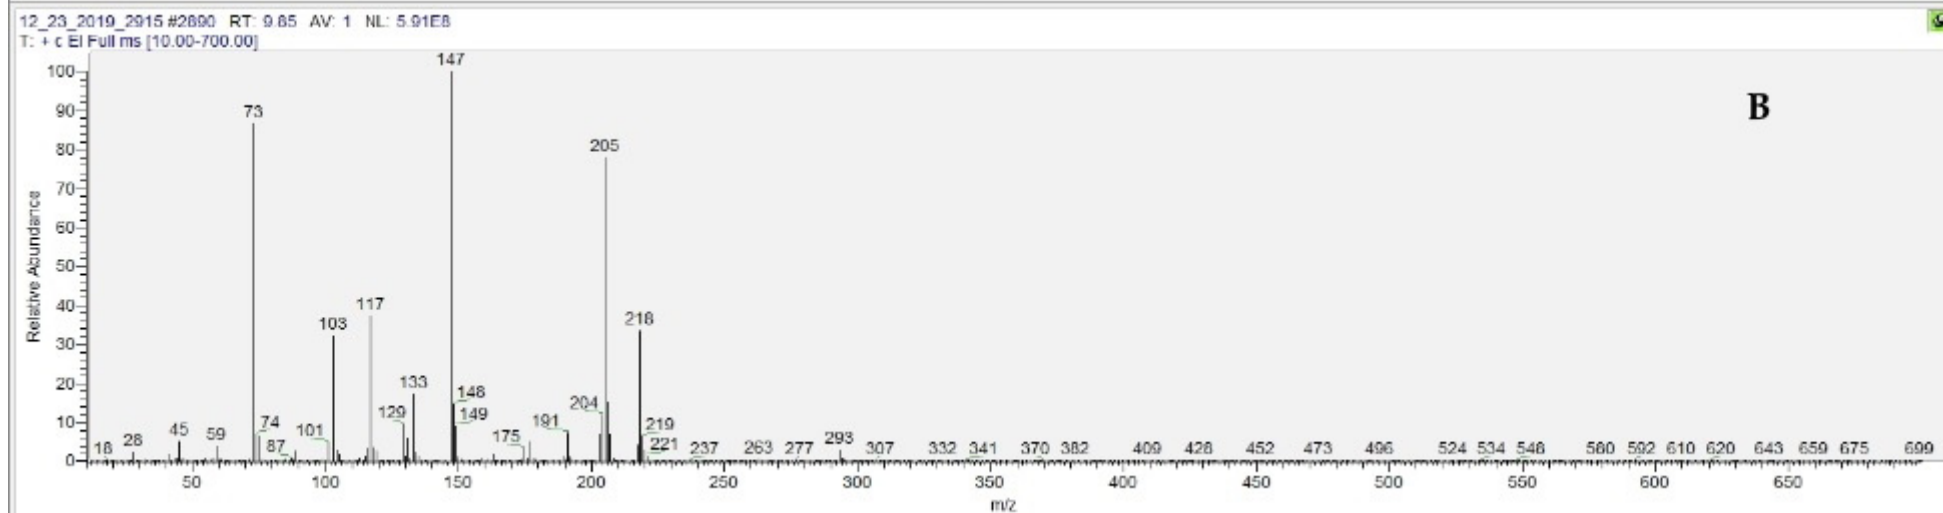

12\_23\_2019\_2914 #1500 RT: 5.13 AV: 1 NL: 1.71E7  
T: + c EI Full ms [10.00-700.00]

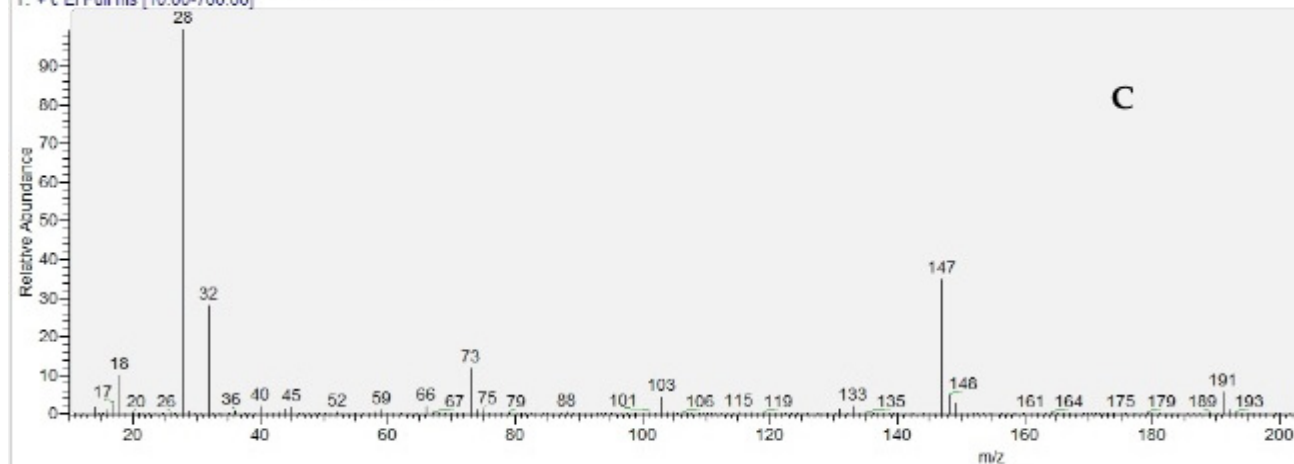

12\_23\_2019\_2915 #1664 RT: 5.68 AV: 1 NL: 2.83E7  
T: + c EI Full ms [10.00-700.00]

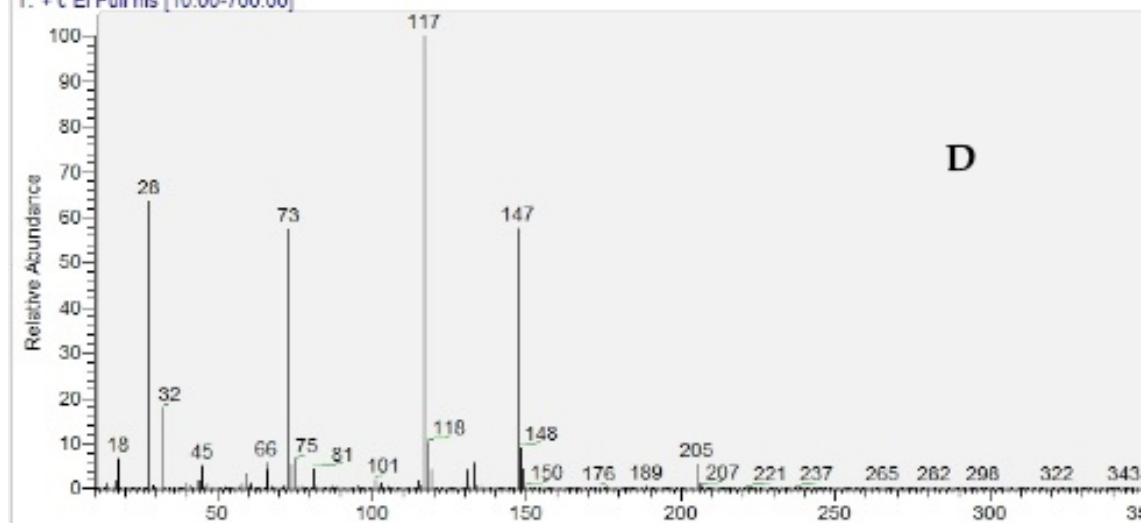

12\_23\_2019\_2914 #2063 RT: 7.04 AV: 1 NL: 2.44E7  
T: + c EI Full ms [10.00-700.00]

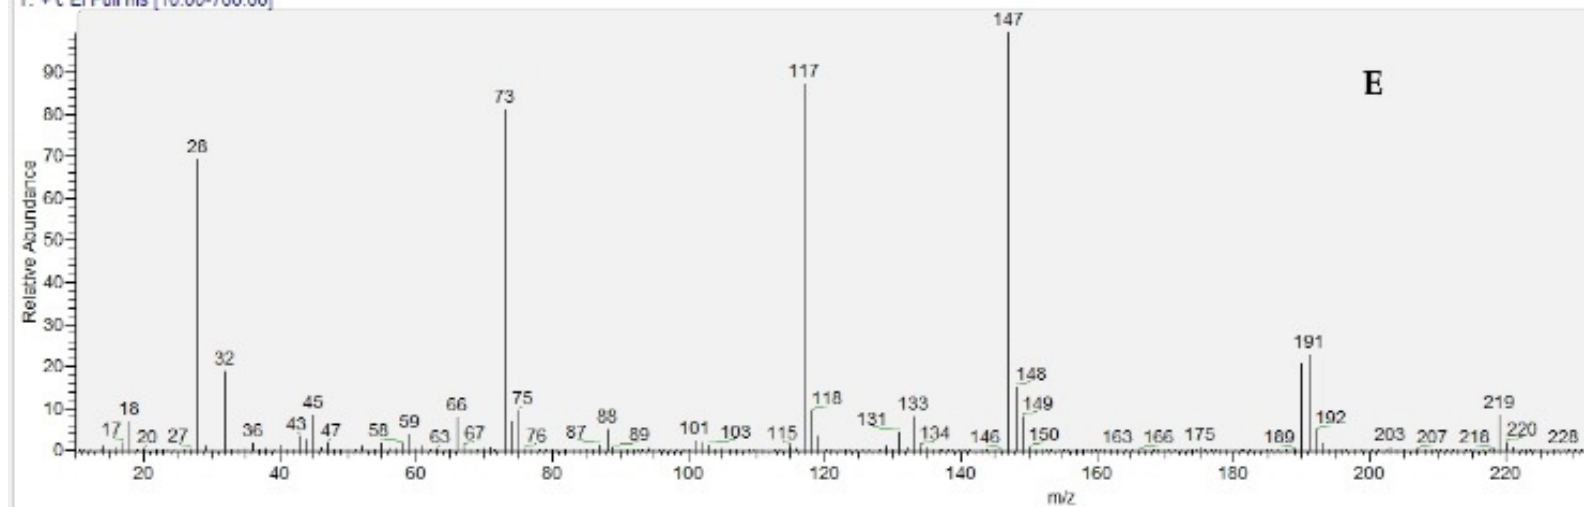

12\_23\_2019\_2915 #2606 RT: 8.88 AV: 1 NL: 1.80E8  
T: + c EI Full ms [10.00-700.00]

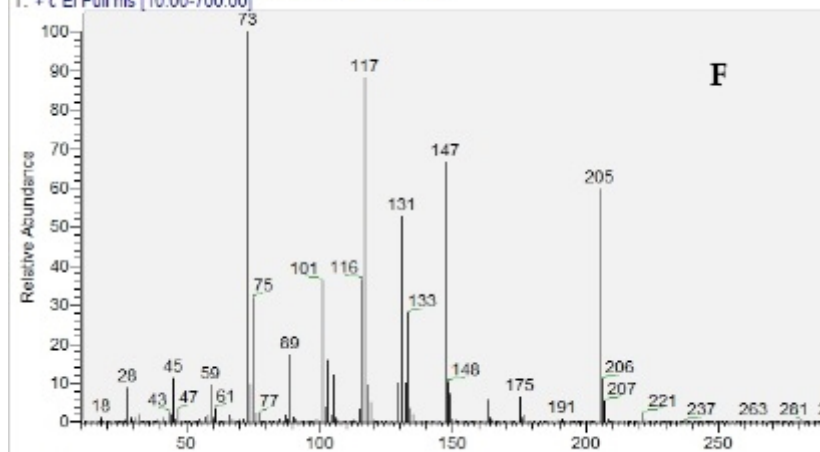

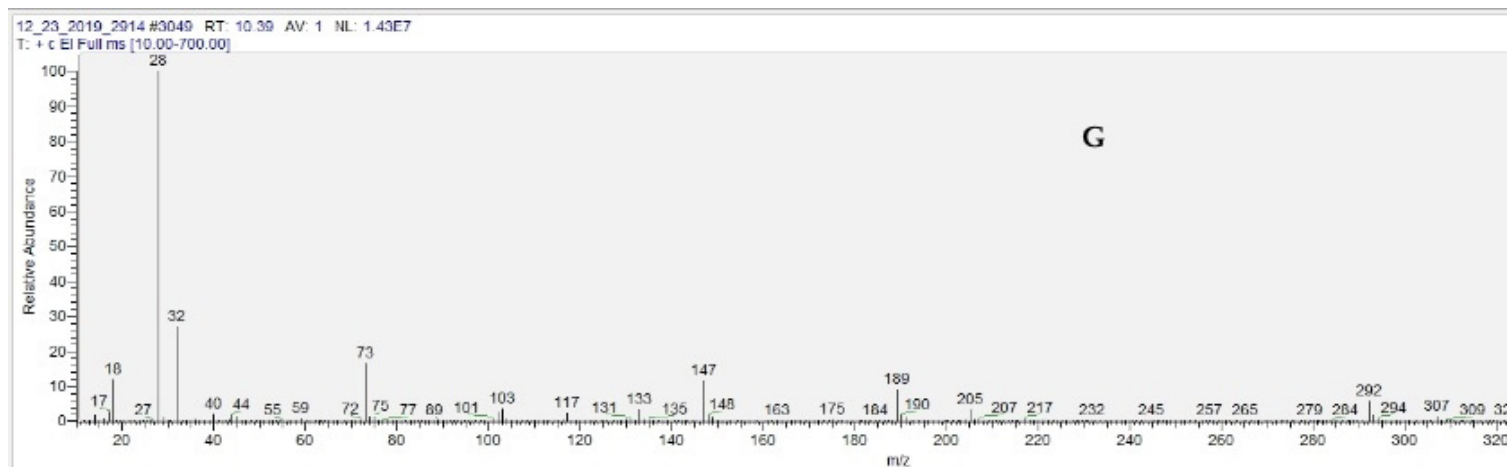

**Figure S2.** **A:** The mass spectrum of silylated liquid sample after glycerol hydrogenolysis reaction; **B:** The mass spectrum of TMS-Gly; **C:** The mass spectrum of TMS-EG; **D:** The mass spectrum of TMS-PG; **E:** The mass spectrum of TMS-LA; **F:** The mass spectrum of TMS-BD; **G:** The mass spectrum of TMS-GA.



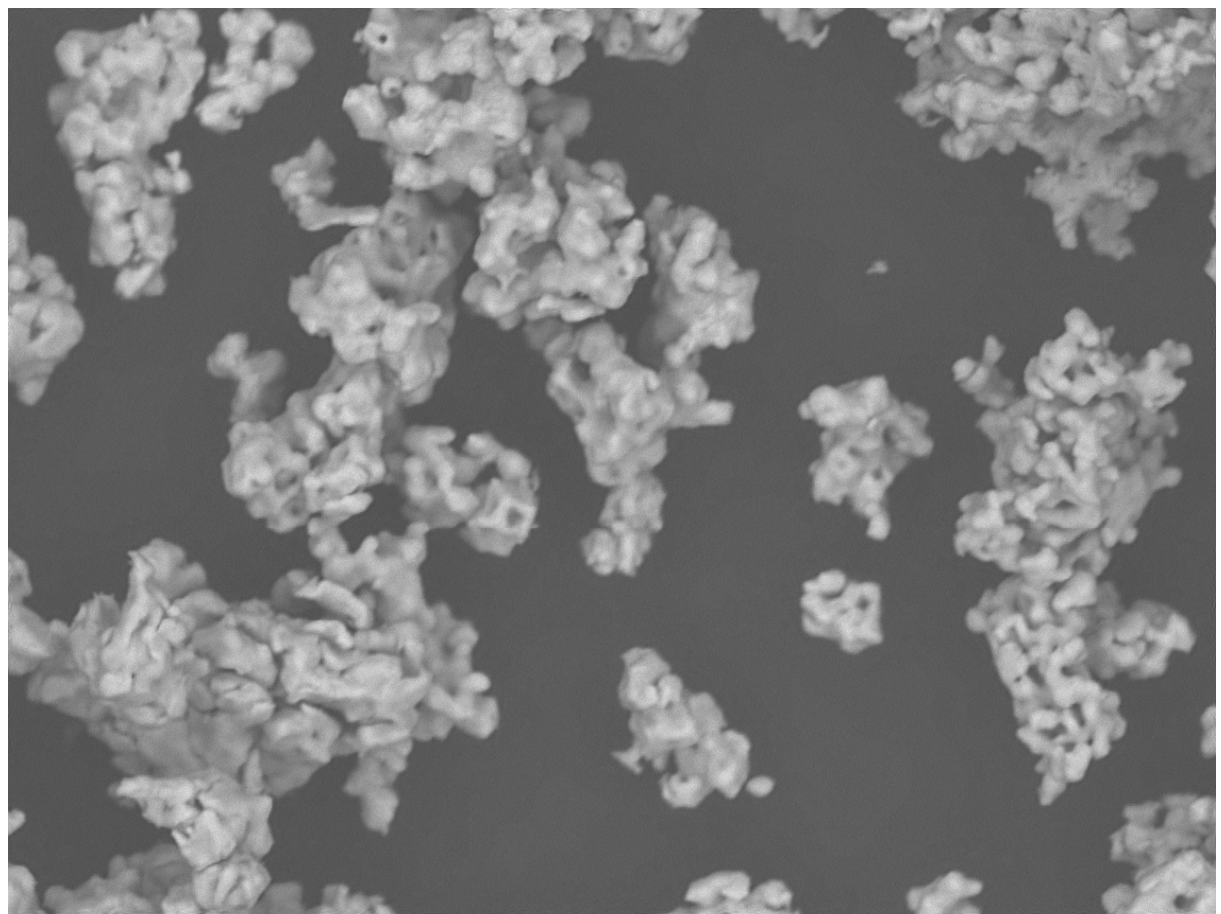

**A**

N D4.7 x4.0k 20  $\mu\text{m}$

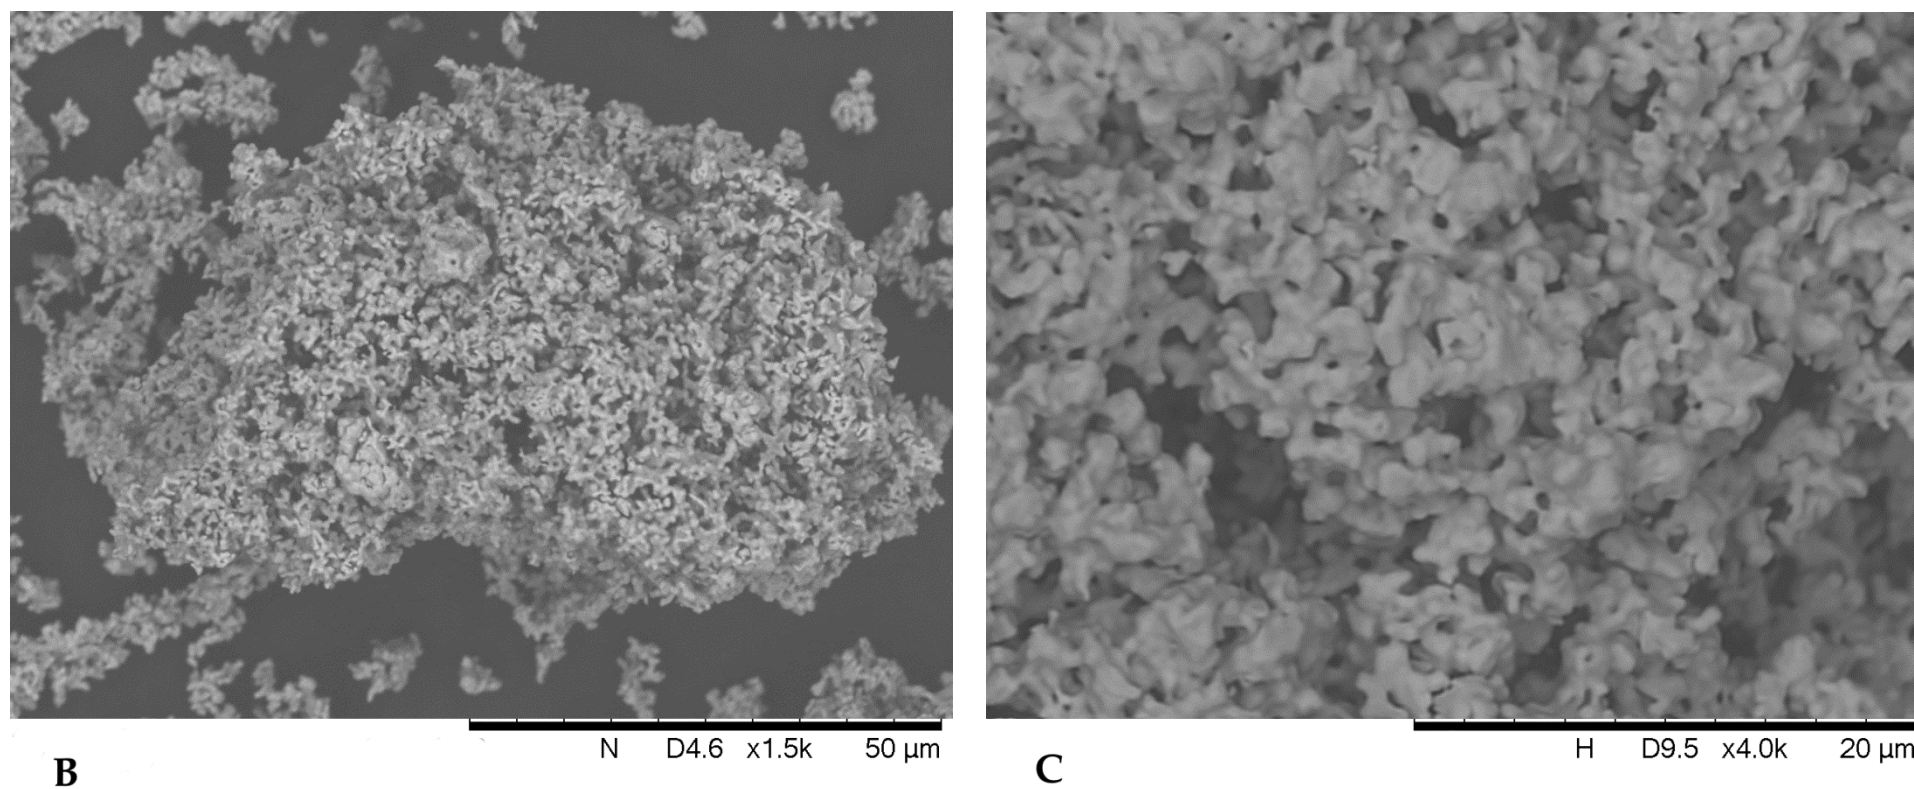

**Figure S3.** The SEM microphotographs of the copper catalysts generated *in situ* in the reaction medium during hydrogenolysis of glycerol. **A, B:** Cu-5; **C:** Cu-15.

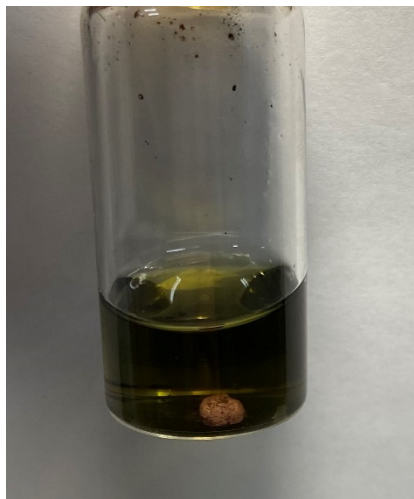

**Figure S4.** The appearance of the catalyst after 60 h of glycerol hydrogenolysis.

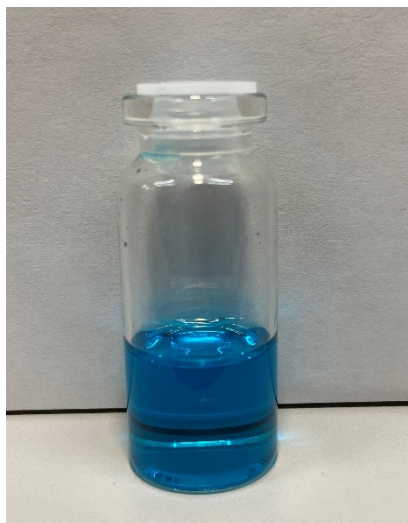

**Figure S5.**  $\text{Cu}(\text{OAc})_2$  in a water–glycerol solution prior to adding potassium hydroxide.
